# Supplementary material
Source: PubMed Central journal article supplement (PMC5274615)
Supplement: 13280_2016_811_MOESM1_ESM.pdf [file 13280_2016_811_MOESM1_ESM.pdf]

***Ambio***

Electronic Supplementary Material

*This supplementary material has not been peer reviewed.*

Title: **Marine pollution originating from purse seine and longline fishing vessel operations in the Western and Central Pacific Ocean, 2003-2015**

Authors: Kelsey Richardson, David Haynes, Anthony Talouli, Michael Donohue

**SPC/FFA REGIONAL OBSERVER  
POLLUTION REPORT**

**FORM GEN-6**

REVISED MARCH 2014

|               |             |                    |         |
|---------------|-------------|--------------------|---------|
| OBSERVER NAME | VESSEL NAME | OBSERVER ID NUMBER | PAGE OF |
|---------------|-------------|--------------------|---------|

**- fill in one form for each pollution incident -**

**INCIDENT DETAILS**

|                          |    |            |    |                                |                |                                  |                                                                                       |                            |               |
|--------------------------|----|------------|----|--------------------------------|----------------|----------------------------------|---------------------------------------------------------------------------------------|----------------------------|---------------|
| Ship's DATE and TIME     |    |            |    |                                | LATITUDE       | N / S                            | LONGITUDE                                                                             | E / W                      | EEZ / HARBOUR |
| DD                       | MM | YY         | hh | mm                             | (dd°mm.mmm')   |                                  | (ddd°mm.mmm')                                                                         |                            |               |
| WIND DIRECTION           |    | WIND SPEED |    | SEA CONDITIONS<br>(C, S, M, R) |                | CURRENT : (knts and direction °) |                                                                                       | OBSERVER'S VESSEL ACTIVITY |               |
| NAME OF OFFENDING VESSEL |    |            |    | IRCS                           | TYPE OF VESSEL |                                  | YOUR POSITION FROM OFFENDING VESSEL<br>Compass Bearing      Distance (nautical miles) |                            |               |

**WASTE DUMPED OVERBOARD**

| Material                                                 | <i>Tick each box that applies</i> | Describe Type | Describe Quantity |
|----------------------------------------------------------|-----------------------------------|---------------|-------------------|
| Plastics                                                 | <input type="checkbox"/>          |               |                   |
| Metals                                                   | <input type="checkbox"/>          |               |                   |
| Waste oil                                                | <input type="checkbox"/>          |               |                   |
| Chemicals                                                | <input type="checkbox"/>          |               |                   |
| General garbage<br><i>(within 12 miles of shoreline)</i> | <input type="checkbox"/>          |               |                   |

**OIL SPILLAGES AND LEAKAGES**

| Source                              | <i>Tick each box that applies</i> | Visual Appearance / Colour | Describe Area and Quantity |
|-------------------------------------|-----------------------------------|----------------------------|----------------------------|
| Vessel Aground / Collision          | <input type="checkbox"/>          |                            |                            |
| Vessel at Anchor / Berth            | <input type="checkbox"/>          |                            |                            |
| Vessel Underway                     | <input type="checkbox"/>          |                            |                            |
| Land based source - Describe source | <input type="checkbox"/>          |                            |                            |
| Other                               | <input type="checkbox"/>          |                            |                            |

**Abandoned or Lost Fishing Gear**

| Source              | Activity | Describe Gear | Estimate Quantity |
|---------------------|----------|---------------|-------------------|
| Lost during fishing |          |               |                   |
| Abandoned           |          |               |                   |
| Dumped              |          |               |                   |

*Other comments:*

*W*  
*Did you take any photos?*

|       |
|-------|
| Y / N |
| Y / N |

*IJ*  
*..*

**MARPOL Regulations - state**

*It is illegal for any vessel to discard any form of plastics into the sea at anytime.*

*It is illegal for any vessel to discard any form of oil into the sea at anytime.*

*It is illegal for any vessel to dump any form of rubbish into the sea within 12 nautical mile of the sea shore.*

## POLLUTION REPORT

Remember - Fill in one form for each pollution incident. There might be more than one per day.  
If forms run out, report this on the last form and continue recording pollution infringements in diary.

|                                             |                                                                                                                                                                                                                                                                                                                |
|---------------------------------------------|----------------------------------------------------------------------------------------------------------------------------------------------------------------------------------------------------------------------------------------------------------------------------------------------------------------|
| <b>Observer Name</b>                        | Put first name first, and your family name last.                                                                                                                                                                                                                                                               |
| <b>Vessel Name</b>                          | Record the full name of the vessel. Do not use any abbreviations.                                                                                                                                                                                                                                              |
| <b>Observer ID Number</b>                   | Use the number assigned by the observer programme e.g. AA 03-01                                                                                                                                                                                                                                                |
| <b>Page of</b>                              | Number all GEN-6 pages in sequence from the start until the end of the trip                                                                                                                                                                                                                                    |
| <b>Date of Incident (dd/mm/yy)</b>          | Date pollution seen in day, month and year. <i>Use ship's time as defined in other observer data collection forms</i>                                                                                                                                                                                          |
| <b>Time (00.00 hrs)</b>                     | Report the time using the 24hr clock.                                                                                                                                                                                                                                                                          |
| <b>Latitude / Longitude</b>                 | Record the GPS position of the host vessel when the pollution was first seen.                                                                                                                                                                                                                                  |
| <b>EEZ / Harbour</b>                        | Record the EEZ or, for shorebase staff, mark port or Harbour name here.                                                                                                                                                                                                                                        |
| <b>Wind Direction</b>                       | The prevailing wind direction. Use degree eg. 90 degrees for an east wind                                                                                                                                                                                                                                      |
| <b>Wind Speed</b>                           | Record the prevailing wind speed.                                                                                                                                                                                                                                                                              |
| <b>Sea Conditions</b>                       | C- Calm, S- Slight, M- Moderate, R - Rough.                                                                                                                                                                                                                                                                    |
| <b>Current (knts and direction)</b>         | If the vessel has a current meter find out what the current strength is.                                                                                                                                                                                                                                       |
| <b>Observer's vessel activity</b>           | State the host (observer's) vessel activity at the time of the pollution incident.<br>Some activities to consider might be:<br>fishing; transshipping; bunkering; transitting; aground.                                                                                                                        |
| <b>Name of offending vessel</b>             | Make an effort to record the complete and proper name of offending vessel.<br>Be careful not to make any spelling mistakes which may make it difficult to prosecute the vessel if the report goes through legal proceedings.                                                                                   |
| <b>IRCS</b>                                 | The international callsign is marked in large letters on the side of the boat.                                                                                                                                                                                                                                 |
| <b>Type of vessel</b>                       | Consider the full vessel and aircraft codes on the front of Form GEN-1.                                                                                                                                                                                                                                        |
| <b>Your position from offending vessel.</b> | vessel.<br>The radar can be used to get an exact distance in nautical miles.<br>Otherwise give best estimate and note if it is the observer's or someone                                                                                                                                                       |
| <b>WASTE DUMPED OVERBOARD</b>               |                                                                                                                                                                                                                                                                                                                |
| <b>Material</b>                             | Tick each correct box to show which types of materials were dumped.<br>Only tick two or more materials if vessel has dumped more than one material type over at the same time - e.g.: it dumped plastic and metal at 10:00hrs.<br>If plastic was dumped at 10:00hrs and metal at 16:00hrs - record separately. |
| <b>Describe type</b>                        | Give as good a description as possible of the type of dumped material.<br>E.g.: - plastic bags; bait boxes plastic strapping; bait boxes plastic bags; etc.                                                                                                                                                    |
| <b>Describe Quantities</b>                  | Give a best estimate of the amount dumped. Sometimes this will be easy - e.g., 12 metal oil drums were dumped. At other times the material might be too far away to see the amount. If it is too far away then estimate the amount as well as possible and make note that it is only a rough estimate at       |
| <b>OIL SPILLAGES AND LEAKAGES</b>           |                                                                                                                                                                                                                                                                                                                |
| <b>Source</b>                               | Tick to indicate where the spillage or leak came from                                                                                                                                                                                                                                                          |
| <b>Visual Appearance / Colour</b>           | Describe the colour/ thickness/depth of the spill as well as able.                                                                                                                                                                                                                                             |
| <b>Describe Area and Quantity</b>           | Give a best estimate of the size of the spill.<br>The boat could be a size reference - e.g.: it was 4 times bigger than the boat.                                                                                                                                                                              |
| <b>Abandoned or Lost Fishing Gear</b>       |                                                                                                                                                                                                                                                                                                                |
| <b>Lost during fishing</b>                  | Lost by host vessel. Describe activity when gear lost (setting/hauling/soak)                                                                                                                                                                                                                                   |
| <b>Abandoned</b>                            | For any fishing gear abandoned by another vessel and found by host vessel                                                                                                                                                                                                                                      |
| <b>Dumped</b>                               | For any gear dumped by host vessel, see above.                                                                                                                                                                                                                                                                 |

**Supplementary notes on Marpol Regulations**

Note: Vessels may dump garbage as close as 3 nautical miles to the shore if they have a 'comminuter' onboard (a machine that shreds garbage to tiny pieces).

Otherwise they cannot dump garbage within 12 nm of the coast. Report on all vessels dumping within 12nm of the coast. We can check if they have a comminuter onboard later.

**Country Codes**

|    |                           |    |                  |
|----|---------------------------|----|------------------|
| AS | American Samoa            | MH | Marshall Islands |
| AU | Australia                 | NR | Nauru            |
| CK | Cook Islands              | NC | New Caledonia    |
| EC | Ecuador                   | NZ | New Zealand      |
| FM | Fed. States of Micronesia | NU | Niue             |
| FJ | Fiji Islands              | MR | Northern Mariana |
| FR | France                    | PW | Palau            |
| PF | French Polynesia          | PG | Papua New Guinea |
| GU | Guam                      | PH | Philippine       |
| ID | Indonesia                 | RU | Russia           |
| IW | International Waters      | SB | Solomon Islands  |
| JP | Japan                     | TW | Taiwan           |
| TO | Kingdom of Tonga          | TK | Tokelau          |
| KI | Kiribati                  | TV | Tuvalu           |
| KR | Korea                     | US | United States    |
| CN | Mainland China            | VU | Vanuatu          |
